1      **Temporal Gut Microbial Changes Predict Recurrent *Clostridium difficile* in Patients with and**  
2                                       **without Ulcerative Colitis**

3                                       Running Title: Fecal microbiota predict recurrent CDI in UC

4  
5      **Allen A. Lee, MD<sup>1\*</sup>**; **Krishna Rao, MD, MS<sup>2\*</sup>**; Julajak Limsrivilai, MD, MSc<sup>3</sup>, Merritt Gilliland III,  
6      PhD<sup>1</sup>; Benjamin Malamet<sup>4</sup>, Emily Briggs<sup>1</sup>, Vincent B. Young, MD, PhD<sup>2,5</sup>, Peter DR Higgins, MD,  
7      PhD, MSc<sup>1</sup>

8      **\*Author names in bold designate shared co-first authorship.**

9  
10     1. Division of Gastroenterology, Department of Internal Medicine, University of Michigan  
11     School of Medicine, Ann Arbor, MI.

12     2. Division of Infectious Diseases, Department of Internal Medicine, University of Michigan  
13     School of Medicine, Ann Arbor, MI.

14     3. Division of Gastroenterology, Department of Internal Medicine, Siriraj Hospital, Mahidol  
15     University, Bangkok, Thailand.

16     4. Oakland University William Beaumont School of Medicine, Rochester, MI

17     5. Department of Microbiology and Immunology; University of Michigan School of Medicine,  
18     Ann Arbor, MI.

19

20      **GRANT SUPPORT:**

21      This study was funded by a research grant from the Crohn's and Colitis Foundation of America,  
22      awarded to PH. PH also receives support from the NIH and the University of Michigan. AAL

23 receives support from the National Center for Advancing Translational Sciences of the NIH  
24 (KL2TR002241). VBY and KR receive support from the NIH (AI124255).

25

26 **ABBREVIATIONS:**

27 AuROC, area under the receiver operating characteristic curve; CDI, *Clostridium difficile*  
28 infection; EOA, end of antibiotics; FMT, fecal microbiota transplantation; IBD, inflammatory  
29 bowel disease; Lasso, least absolute shrinkage and selection operator; JSD, Jensen-Shannon  
30 distance; MHI, microbiome health index; OTU, operational taxonomic unit; PERMANOVA,  
31 permutational multivariate analysis of variance; rCDI, recurrent *Clostridium difficile* infection;  
32 UC, ulcerative colitis.

33

34 **CORRESPONDENCE:**

35 Peter D. R. Higgins, MD, PhD, MSc  
36 3906 Taubman Center  
37 1500 E. Medical Center Dr., SPC 5352  
38 Ann Arbor, MI 48109  
39 Ph: (734) 647-5944  
40 Email: [phiggins@med.umich.edu](mailto:phiggins@med.umich.edu)

41

42 **DISCLOSURES:**

43 The authors have no disclosures.

44

45 **AUTHOR CONTRIBUTIONS:**

46 AL collected clinical data, participated in analysis and interpretation of the data, statistical  
47 analysis, and drafted the manuscript. KR participated in analyzing the data, interpreting the  
48 results, statistical analysis, and helped draft the manuscript. JL participated in acquisition of  
49 clinical data and sample processing. MG participated in acquisition of data, sample processing  
50 and data analysis. BM participated in acquisition of clinical data and sample processing. VBY  
51 participated in study design, interpreting the results, helped draft the manuscript. PDRH  
52 conceived the study, participated in subject recruitment, data acquisition, interpretation of the  
53 results, and helped draft the manuscript. All authors were involved in critical revision of the  
54 manuscript and approved the final manuscript.

55

56 **Word Count: 6,702**

57

58

59

60

61

62

63

64

65

66

67 **ABSTRACT:**

68 **Background:**

69 Ulcerative colitis (UC) carries an increased risk of primary and recurrent *Clostridium difficile*  
70 infection (rCDI) and CDI is associated with UC flares. We hypothesized that specific fecal  
71 microbial changes associate with UC flare and rCDI.

72

73 **Methods:**

74 We conducted a prospective observational cohort study of 57 patients with UC and CDI, CDI  
75 only, and UC flare only. Stool samples were collected at baseline, at the end of antibiotic  
76 therapy, and after reconstitution for 16S rRNA sequencing. The primary outcomes were  
77 recurrent UC flare and rCDI. Logistic regression and Lasso models were constructed for analysis.

78

79 **Results:**

80 There were 21 (45.7%) patients with rCDI, while 11 (34.4%) developed UC flare. Patients with  
81 rCDI demonstrated significant inter-individual ( $P=.008$ ) and intra-individual differences ( $P=.004$   
82 relative to baseline samples) in community structure by Jensen-Shannon distance (JSD)  
83 compared with non-rCDI. Two cross-validated models identified by Lasso regression predicted  
84 risk of rCDI: a baseline model with female gender, hospitalization for UC in the past year,  
85 increased Ruminococcaceae and Verrucomicrobia, and decreased Eubacteriaceae,  
86 Enterobacteriaceae, Lachnospiraceae, and Veillonellaceae (AuROC=0.94); and a model 14 days  
87 after completion of antibiotics with female gender, increased Shannon diversity,  
88 Ruminococcaceae and Enterobacteriaceae, and decreased community richness and

89 Faecalibacterium (AuROC=0.9). Adding JSD between baseline and post-treatment samples to  
90 the latter model improved fit (AuROC=0.94). A baseline model including UC hospitalization in  
91 the past year and increased Bacteroidetes showed good fit characteristics for predicting  
92 increased risk of UC flare (AuROC=0.88).

93

94 **Conclusion:**

95 Fecal microbial features at baseline and following therapy predict rCDI risk in patients with and  
96 without UC. These results may help risk stratify patients to guide management.

97

98 **Keywords:** Gut microbiota, predictive modeling, *Clostridium difficile* infection, ulcerative colitis,  
99 Lasso regression

100

101

102

103

104

105

106

107

108

109

110

111 **INTRODUCTION:**

112           Although the pathogenesis of ulcerative colitis (UC) is incompletely understood,  
113 accumulating evidence suggests that disruptions of gut microbial structure and function  
114 contribute to inflammatory bowel disease (IBD). Introduction of gut microbiota taken from IBD  
115 patients and introduced into gnotobiotic mouse models of IBD can elicit proinflammatory  
116 immune responses similar to those seen in IBD patients.<sup>1</sup> Moreover, intestinal inflammation  
117 may induce further derangements in the gut microbial community.<sup>2,3</sup> Thus, IBD may be seen as  
118 a deleterious feedback cycle of disruptions to the gut microbiota and alterations in host  
119 immune responses.

120

121           Patients with IBD, particularly those with UC, are at higher risk for *Clostridium difficile*  
122 (recently reclassified as *Clostridiodes difficile*) infection (CDI).<sup>4-6</sup> IBD patients have multiple risk  
123 factors for CDI, including frequent antibiotic use, prior hospitalization, and/or a  
124 immunocompromised state, but CDI occurs at increased rates even in IBD patients without  
125 these traditional risk factors.<sup>7</sup> It is possible that alterations in the gut microbial community may  
126 predispose IBD patients to CDI. Murine models suggest that shifts in microbial ecology are  
127 associated with susceptibility to experimental CDI.<sup>8</sup> Notably, these changes in microbial  
128 dynamics in CDI are similar to those consistently observed in IBD. IBD patients with CDI also  
129 carry a 2-fold increased risk of hospitalization for subsequent exacerbation of IBD, increased  
130 risk for colectomy, and almost 5-fold increased risk for mortality compared to those without  
131 CDI.<sup>5,9-11</sup> IBD patients are also significantly more likely to have recurrent CDI (rCDI) compared  
132 with non-IBD controls.<sup>12</sup>

133           It is not clear how the microbiome disruptions seen in CDI and IBD relate to each other  
134 and/or interact. Thus, we aimed to characterize the fecal microbiota in patients with UC  $\pm$  CDI  
135 longitudinally and investigate possible relationships to rCDI and recurrent UC flare. We  
136 hypothesized that poor reconstitution of the gut microbiome at the End of Antibiotics + 14 days  
137 (EOA+14) would be associated with rCDI and/or subsequent UC flare.

138

## 139 **METHODS:**

### 140 ***Study Design:***

141           We conducted a prospective, observational cohort study at the University of Michigan.  
142 We recruited subjects from the following three groups: symptomatic patients with UC who also  
143 tested positive for CDI (cohort 1); non-IBD patients with symptomatic CDI (cohort 2); and  
144 patients with UC flare without CDI (cohort 3) (**Supplementary Figure 1**).

145

146           All subjects were 18 years or older and provided informed consent prior to enrollment  
147 in the study. Subjects were excluded from the study if they had presence of an ostomy or  
148 previous history of colectomy. Subjects in cohorts 1 and 3 had prior clinical, endoscopic and  
149 histologic diagnosis of UC while subjects in cohort 2 had no documented history of UC or  
150 autoimmune disease.<sup>13</sup> The study was approved by the institutional review board at the  
151 University of Michigan (see Supplemental Methods for full details).

152           The primary outcomes were subsequent UC flare and rCDI. Secondary aims included  
153 identifying any microbial features at baseline that may discriminate between patients with CDI  
154 compared with UC. Subjects were contacted and their medical records were reviewed every 60

155 days for up to 180 days after enrollment to determine the recurrence of UC flare and rCDI. Due  
156 to the small sample sizes in each cohort, patients in cohorts 1 and 2 were analyzed collectively  
157 to determine the rate of rCDI while adjusting for UC status. Patients in cohort 1 were also  
158 followed to determine the rate of UC flare. As patients in cohort 3 (UC flare only) were  
159 experiencing an exacerbation of their UC on enrollment, it was not possible to differentiate  
160 between an on-going vs. recurrent UC flare. As a result, patients in cohort 3 were excluded  
161 from meeting the primary endpoint of UC flare but were used to adjust models for UC status.  
162 Patients in cohort 3 were also analyzed to determine potential differences in microbial variables  
163 between UC and CDI at baseline.

164 UC flare was defined by onset of typical symptoms occurring after enrollment in the  
165 study along with 6-point Mayo score > 2.5 and a fecal calprotectin > 150 in the absence of  
166 CDI.<sup>14</sup> CDI was diagnosed by presence of diarrhea ( $\geq 3$  unformed stools in a 24-hour period) and  
167 a positive stool test for toxigenic *C. difficile* (positive testing for both the glutamate  
168 dehydrogenase [GDH] antigen and TcdA/TcdB by EIA [C. Diff Quik Chek Complete®, Alere,  
169 Waltham, MA], or real-time PCR for the *tcdB* gene performed when GDH/toxin results were  
170 discordant [Simplexa™ *C. difficile* Universal Direct, Diasorin Molecular LLC, Cypress, CA]). Initial  
171 diagnostic tests were performed by the University of Michigan clinical microbiology laboratory.  
172 rCDI was defined by recurrence of symptoms at least 14 days after initial treatment of CDI and  
173 positive *C. difficile* testing.<sup>15</sup>

174

175 **Stool Collection:**



176 For cohorts 1 and 2, stool samples were collected from all subjects at baseline (day 0)  
177 prior to initiation of antibiotics for CDI and/or medical therapy for UC flare (**Supplemental**  
178 **Figure 2**). Stool samples were also collected at the end of antibiotics (EOA, approximately day  
179 14) and EOA plus 14 days (approximately day 30). For cohort 3, stool samples were collected at  
180 baseline and at day 30 after clinical remission was achieved.

181

### 182 ***16S Sequence Analysis:***

183 DNA was extracted and libraries were prepared by the University of Michigan Host  
184 Microbiome core, the 16S rRNA genes were sequenced, and the *mothur* computational  
185 pipeline<sup>16</sup> was deployed for processing sequence data as previously described (see  
186 Supplemental Methods).<sup>17</sup> Following this, the following microbiome metrics were generated:  
187 Shannon diversity, Jensen-Shannon distance (JSD) relative to baseline and subsequent samples,  
188 community type using unsupervised partition around medoid clustering based on JSD,<sup>18</sup>  
189 relative abundance of individual operational taxonomic units (OTUs), and other variables based  
190 on taxonomic class. One such constructed metric is the microbiome health index (MHI), defined  
191 as the proportion of Bacteroidia and Clostridia compared to the proportion of  
192 Gammaproteobacteria and Bacilli.<sup>19</sup>

193

### 194 ***Statistical Analysis:***

195 Continuous data were reported as mean and standard deviation (SD) if normally  
196 distributed, and as median and range if not normally distributed. Categorical variables were  
197 reported as frequencies and percentages. Continuous data were compared using one-way

198 ANOVA if data were parametric or Kruskal-Wallis test if non-parametric. Comparisons of  
199 proportions were performed using Fisher's exact test. All data were analyzed using R version  
200 3.5.2 (R Foundation for Statistical Computing, Vienna, Austria). A two-tailed  $P$ -value  $< 0.05$  was  
201 considered significant for all analyses.

202 Unadjusted and adjusted logistic regression analyses were performed to identify clinical  
203 and microbial variables at baseline (time point 1) and at time point 3 (EOA plus 14 days) which  
204 were associated with subsequent UC flare and rCDI. Corrections for multiple comparisons were  
205 performed using the Benjamini-Hochberg method.<sup>20</sup> Only OTUs that were present in at least  
206 10% of samples were included in the analysis. The overall structure of microbial communities  
207 among our primary outcomes was compared using redundancy analysis, an ordination  
208 technique, followed by a permutational, multivariate ANOVA (PERMANOVA) for significance  
209 testing, as implemented by the R package *vegan* version 2.5-4.<sup>21</sup>

210 Two predictive models using different techniques and aims were performed. The first  
211 method included clinical and microbiota variables with  $P$ -values  $< .20$  for the association with  
212 either rCDI or subsequent UC flare based on logistic regression results. A backward stepwise  
213 regression method was used to select predictors in the final multivariable model, and  
214 interactions among the variables in the final model were assessed. This modeling strategy  
215 helped quantify the magnitude, strength, and statistical significance of individual predictors  
216 while accounting for confounding. However, it is not ideal for avoiding overfitting and  
217 maximizing generalizability of models.

218 Due to the large number of possible predictor variables, and in order to generate  
219 models that minimized overfitting, a second approach using Lasso (least absolute shrinkage and

220 selection operator) regression with cross validation was also employed. Models were built in a  
221 stepwise regression fashion, and the optimal model was automatically selected using a 3-fold  
222 cross-validation that minimized the penalty term (i.e.  $\lambda$ ), as implemented in the *glmnet* package  
223 version 2.0-16.<sup>22</sup> Since cross-validation includes a component of randomness, this stepwise  
224 modeling strategy was simulated 1,000 times and those variables that appeared most  
225 frequently were selected for inclusion in the final model. The area under the receiver operator  
226 characteristic curve (AuROC) was calculated for each model using the R package pROC version  
227 1.14.0.<sup>23</sup>

228 To assess longitudinal associations between clinical and microbial variables of interest  
229 with the primary outcomes, generalized estimating equations (GEE) with an exchangeable or  
230 auto-regressive correlation structure, generalized linear mixed-effects models (GLMER) and  
231 generalized additive models (GAM) were utilized using the R packages *geepack* version 1.2-1,<sup>24</sup>  
232 *lme4* version 1.1-21,<sup>25</sup> and *mgcv* version 1.8-28,<sup>26</sup> respectively.

233

## 234 **RESULTS:**

### 235 ***Baseline Clinical Variables:***

236 A total of 57 subjects were enrolled in this study (32 with UC/CDI, 14 with CDI only, and  
237 11 with UC only). Patients with CDI only were older compared to those with UC/CDI and UC  
238 only ( $P=.001$ ) (**Table 1**). Patients with UC only were significantly more likely to receive steroids  
239 as their initial treatment for UC flare compared to those subjects with UC and CDI (90.9% vs.  
240 31.2%,  $P=.001$ ). Patients with UC only were also less likely to have received antibiotics in the  
241 past year compared to patients with UC and CDI or patients with CDI only ( $P=.006$ ). There were

242 no other clinical variables at baseline that differed significantly between the three groups. A  
243 total of 21 subjects (45.7%) met the primary endpoint for rCDI while 11 subjects (34.4%)  
244 developed a subsequent UC flare.

245

246 ***Patients with CDI Show Reduced Microbial Diversity and Richness at Baseline Compared with***  
247 ***UC:***

248 Microbial features at baseline were compared in patients with UC and CDI. Patients with  
249 CDI showed decreased Shannon diversity ( $P < .05$ ) and community richness ( $P = .002$ ) at baseline  
250 compared with UC even after controlling for UC status (**Supplemental Table 1**). There were also  
251 several OTUs, including several Lachnospiraceae genera, that were depleted at baseline in  
252 patients with CDI compared with UC.

253

254 ***Patients with rCDI Exhibited a Distinct Community Structure Compared with Non-rCDI:***

255 We next performed redundancy analysis to explore differences in microbial  
256 communities across populations with rCDI and UC flare as variables (cohorts 1 and 2). There  
257 were significant differences in the baseline community structure between patients who  
258 subsequently developed rCDI vs. non-rCDI ( $P = .008$  by PERMANOVA), **Figure 1A**). No significant  
259 differences were seen between patients with subsequent UC flare vs. without a recurrent UC  
260 flare ( $P = .44$ ) (**Figure 1B**).

261

262 ***Patients with rCDI Showed Greater Intra-Individual Variability of the Fecal Microbiota Over***  
263 ***Time:***

264 We then evaluated intra-individual community changes in cohorts 1 and 2 by Jensen-  
265 Shannon Distance (JSD, ranging from 0, indicating complete similarity relative to baseline  
266 samples, to 1 or complete dissimilarity with baseline samples) over time. At the end of  
267 antibiotics (EOA), there were no differences in JSD between patients who developed rCDI and  
268 those who did not develop rCDI ( $P=.41$ ) (**Figure 2A**). However, 14 days after completion of  
269 antibiotics, those patients who subsequently developed rCDI demonstrated greater dissimilarity  
270 to baseline samples in community structure compared with non-rCDI patients ( $P=.004$ ) (**Figure**  
271 **2B**). There were no differences in JSD at EOA ( $P=.75$ ) or at EOA plus 14 days ( $P=.22$ ) in patients  
272 with and without subsequent UC flare.

273

#### 274 ***Baseline Clinical and Microbial Variables Are Predictive for rCDI:***

##### 275 *Unadjusted Variables Associated with rCDI:*

276 We performed logistic regression models to determine baseline variables that were  
277 associated with risk for rCDI (cohorts 1 and 2) while controlling for UC status (cohorts 1 and 3)  
278 (**Supplemental Table 2**). Female gender was associated with an increased risk for rCDI (OR=2.5,  
279  $P=.05$ ). In terms of microbial variables, an increase in the relative abundance of  
280 Lachnospiraceae at baseline was protective against subsequent risk for rCDI (OR=0.52 for every  
281 10% increase,  $P=.02$ ). There were no other clinical or microbial variables at baseline that were  
282 associated with risk for rCDI.

283

##### 284 *Multivariable Model for rCDI:*

285 Using backward stepwise regression analyses, in our final model we identified five  
286 baseline variables that were significantly associated with rCDI even after adjusting for UC status  
287 (**Table 2**). Female gender was associated with an increased risk for rCDI (OR=16.2,  $P=.005$ ). In  
288 contrast, increased OTU richness (OR=0.86 per every increase of 10 taxa,  $P=.02$ ) as well as  
289 increased relative abundance of Enterobacteriaceae (OR=0.29 per every 10% increase,  $P=.004$ );  
290 Lachnospiraceae (OR=0.17 per every 10% increase,  $P=.002$ ); and Veillonellaceae (OR=0.17 per  
291 every 10% increase,  $P=.05$ ) were protective against rCDI (**Figure 3A-D**). We assessed for  
292 interactions among variables in the final model and none were found. This final model had  
293 excellent fit characteristics (AuROC=0.91) (**Figure 3E**).

294

295 Model selection using 3-fold cross-validated Lasso regression to minimize  $\lambda$  with 1000  
296 simulations identified two clinical and six taxonomic variables at baseline that were associated  
297 with rCDI in the largest number of simulations (**Supplemental Table 3**). Increased risk for rCDI  
298 was associated with hospitalization for UC in the past year and female gender, as well as  
299 increased relative abundances of Verrucomicrobia and Ruminococcaceae. Conversely, an  
300 increase in Eubacteriaceae, Lachnospiraceae, Veillonellaceae, and Enterobacteriaceae at  
301 baseline were protective against subsequent risk for rCDI. When these variables were included  
302 in a Lasso regression model, this final model demonstrated excellent predictive capabilities for  
303 rCDI (AuROC=0.94) (**Figure 3F**).

304

305 ***Baseline Clinical and Microbial Variables Associated with Increased Risk for UC Flare:***

306 *Unadjusted Variables Associated with UC flare:*

307           Prior hospitalization for UC in the past year (OR=16.0,  $P=.003$ ) as well as steroid use as  
308   initial treatment for UC exacerbation (OR=10.5,  $P=.008$ ) were significantly associated with risk  
309   for UC flare (cohort 1) (**Supplemental Table 2**). An increase in the relative abundance of  
310   Bacteroidetes was associated with increased risk for UC flare (OR=2.06 for every 10% increase,  
311    $P=.01$ ) (**Supplemental Figure 3**).

312

313   *Multivariable Modeling Associated with UC Flare:*

314           Using backward stepwise regression, hospitalization for UC in the previous year  
315   (OR=17.70,  $P=.008$ ) and increased relative abundance of Bacteroidetes at baseline (OR=1.07,  
316    $P=.03$ ) were associated with increased risk for UC flare (AuROC=0.88).

317

318   *Longitudinal Models Utilizing Microbial Variables Predict Increased Risk for rCDI:*

319           We used microbial data from all timepoints in cohorts 1 and 2 to model rCDI by fitting  
320   generalized estimating equations (GEE) and generalized linear mixed models (GLMM) while  
321   adjusting for UC status (cohorts 1 and 3). However, models using both GEE and GLMM either  
322   did not converge, resulted in singular fits, or gave nonsensical results. This was likely related to  
323   excessive collinearity of variables, overdispersion/excessive variability over time, and/or  
324   nonlinearity in the shape of the data. In terms of the latter, since the data did not follow a  
325   linear pattern (**Supplemental Figure 4A-D**), we tried three different approaches to produce a  
326   coherent model. First, in order to more accurately model the parabolic nature of the dataset, a  
327   quadratic term was introduced but this still did not result in models that converged. Secondly,  
328   we also modeled our data at two different time points, including at time points 1 (baseline) and

329 3 (EOA plus 14 days) and separately at time points 2 (EOA) and 3 (EOA plus 14 days). However,  
330 modeling with only two time points did not produce a model that converged. Finally, we used  
331 generalized additive models (GAM), which introduce a penalized regression spline in order to  
332 model non-linear data. Here, we identified by GAM that female gender as well as decreasing  
333 OTU richness and increasing Ruminococcaceae longitudinally were associated with future risk  
334 for rCDI (AuROC=0.87).

335

### 336 ***Clinical and Microbial Variables at Time Point 3 Also Predict Risk for rCDI:***

#### 337 *Unadjusted Variables Associated with rCDI:*

338 We next performed logistic regression modeling to determine whether microbial  
339 features at time point 3 (microbial reconstitution, EOA plus 14 days) were associated with rCDI  
340 (cohorts 1 and 2) while controlling for UC status (cohorts 1 and 3) (**Supplemental Table 4**). An  
341 increased relative abundance of Gammaproteobacteria (OR=1.63 per every 10% increase,  
342  $P=.04$ ), Enterobacteriaceae (OR=1.78 per every 10% increase,  $P=.03$ ), and Jensen-Shannon  
343 Distance (JSD) at time point 3 relative to baseline (OR=1.80 per every 0.1 increase,  $P=.01$ ) were  
344 associated with increased rCDI risk. Conversely, an increase in Shannon diversity (OR=0.34,  
345  $P=.04$ ) and OTU richness (OR=0.85 per every increase of 10 taxa,  $P=.008$ ) as well as increased  
346 relative abundance of Ruminococcaceae (OR=0.40 per every 10% increase,  $P=.04$ ) and  
347 Faecalibacterium (OR=0.10 per every 10% increase,  $P=.04$ ) were all protective against future  
348 risk for rCDI. Additionally, at a lower level of significance, increased Bacteroidetes (OR=0.60 per  
349 every 10% increase,  $P=.05$ ), Lachnospiraceae (OR=0.62 per every 10% increase,  $P=.06$ ) and MHI  
350 (OR=0.78 per every 1% increase,  $P=.05$ ) were also protective against rCDI.



351

352 *Multivariable Model Selection for rCDI:*

353           Model selection by backward stepwise regression identified four clinical and microbial  
354 variables at time point 3 that were significantly associated with rCDI after adjusting for UC  
355 status (**Table 3**). Female gender (OR=5.69,  $P=.03$ ) and increased relative abundance of  
356 Ruminococcaceae (OR=1.43 per every 1% increase,  $P=.03$ ) were associated with increased risk  
357 for future rCDI. In contrast, an increase in OTU richness (OR=0.83 per every increase of 10 taxa,  
358  $P=.03$ ), and increased relative abundance of Faecalibacterium (OR=0.47 per every 1% increase,  
359  $P=.02$ ) were protective against rCDI (**Figure 4A-C**). This model showed good fit characteristics  
360 (AuROC=0.87) for predicting rCDI. When Jensen-Shannon Distance (JSD) at time point 3 relative  
361 to baseline was added to the model, it had a statistically significant effect by likelihood ratio  
362 testing ( $P=.007$ ) and improved the model fit (AuROC=0.90).

363           Cross-validated Lasso regression simulations identified similar variables to the backward  
364 stepwise regression, including an increased relative abundance of Ruminococcaceae, decreased  
365 OTU richness, and decreased Faecalibacterium at time point 3 (EOA plus 14 days) as being  
366 associated with increased risk for rCDI (**Supplemental Table 5**). Lasso regression also identified  
367 additional variables associated with increased rCDI, including female gender, increased  
368 Enterobacteriaceae (**Figure 4D**), and increased Shannon diversity (**Figure 4E**). When these  
369 variables selected by the greatest number of simulations were included in a final Lasso  
370 regression model, this model showed excellent predictive capabilities for identifying rCDI  
371 (AuROC=0.90). When Jensen-Shannon Distance (JSD) at time point 3 relative to baseline was  
372 added, the model showed increased fit characteristics (AuROC=0.94) (**Figure 4F**).

373

374 ***Clinical and Microbial Variables Did Not Associate with UC Flare at Time Point 3:***

375 We did not identify any microbial variables at time point 3 in cohort 1 that were  
376 associated with risk for UC flare. Similarly, model selection by Lasso regression did not identify  
377 any variables that were significantly associated with UC flare (data not shown).

378

379 **DISCUSSION:**

380 We have conducted a prospective, longitudinal cohort study examining whether gut  
381 microbial changes can predict future risk for rCDI and recurrent flare of UC in a cohort of  
382 patients with CDI, with and without UC. In this study, we have shown that specific microbial  
383 characteristics, either at baseline or upon reconstitution of the microbiome, can detect those  
384 patients at high risk for future episodes of rCDI and UC flare. Specifically, we demonstrated that  
385 (1) patients with CDI  $\pm$  UC who subsequently develop rCDI possess a distinct microbial  
386 community structure compared with non-rCDI patients; (2) there are unique microbial  
387 characteristics at baseline which can identify patients at risk for rCDI with 94% accuracy; (3)  
388 those patients with on-going perturbations of their fecal microbiota two weeks after  
389 completion of antibiotics are at increased risk for rCDI; and (4) patients with history of  
390 hospitalization for UC in the previous year and increased Bacteroidetes at baseline had  
391 increased risk for subsequent UC flare.

392

393 Patients with UC and CDI represent a high-risk patient population with significant risk for  
394 rCDI and poor outcomes. Identifying those patients with higher risk for recurrence of disease

395 would represent a major advance in the field. Our results have identified several key variables  
396 at baseline that are associated with rCDI even after adjusting for UC status. Specifically, female  
397 gender, hospitalization for UC in the prior year, increased Ruminococcaceae and  
398 Verrucomicrobia were associated with increased risk for rCDI while increased abundances of  
399 Eubacteriaceae, Enterobacteriaceae, Lachnospiraceae, and Veillonellaceae were protective  
400 against risk for future rCDI. This model demonstrated excellent discriminative ability with 94%  
401 accuracy to predict future occurrences of rCDI. Notably, these variables were identified in  
402 baseline samples, which suggests that high-risk patients can be identified at the time of CDI  
403 diagnosis. These patients might benefit from more aggressive therapy, such as prolonged  
404 antibiotic tapers, an antibiotic with lower risk of rCDI such as fidaxomicin,<sup>27</sup> use of a monoclonal  
405 antibody to reduce risk of rCDI,<sup>28</sup> fecal microbiota transplantation (FMT), or even a rationally  
406 designed probiotic (based on data from the current study) containing Eubacteriaceae,  
407 Lachnospiraceae, Enterobacteriaceae, and Veillonellaceae.

408 Female gender has previously been identified as an independent risk factor for CDI,<sup>29</sup>  
409 which may be related to differences in sex hormone levels resulting in differences in gut  
410 microbial composition.<sup>30</sup> Widespread changes in the gut microbiota, including lower diversity  
411 and decreased abundance of putatively beneficial bacteria, such as Lachnospiraceae, have been  
412 demonstrated in both UC and CDI.<sup>31,32</sup> Lachnospiraceae is a primary producer of butyrate,  
413 which is known to inhibit *C. difficile* *in vitro*<sup>33</sup> and enhances intestinal epithelial barrier  
414 function.<sup>34</sup> Furthermore, both *C. difficile* and Lachnospiraceae are taxonomically classified  
415 within the Clostridiales order. Thus, Lachnospiraceae may be protective against CDI by  
416 occupying a similar ecological niche within the gastrointestinal tract competing for similar

417 resources as *C. difficile*. In addition, a probiotic containing 33 different bacterial species,  
418 including Lachnospiraceae, Ruminococcaceae, and Eubacteriaceae, was protective against rCDI  
419 for up to 6 months posttreatment.<sup>35</sup>

420         Although there is a paucity of data regarding association between microbial  
421 characteristics and rCDI, the available data show some differences from our results. Studies  
422 prior to FMT in CDI patients have demonstrated widespread changes in the gut microbiota,  
423 including decreased abundances of Lachnospiraceae and Ruminococcaceae as well as  
424 enrichment of Enterococcaceae and Veillonellaceae.<sup>36</sup> Khanna, *et al.* reported increased  
425 abundance of Veillonella, Enterobacteriaceae, and Lachnospiraceae in pre-treatment fecal  
426 samples were associated with rCDI,<sup>37</sup> while our results show the opposite directionality for  
427 these taxa. However, in this prior study, rCDI was determined retrospectively by review of the  
428 electronic medical record. Furthermore, all of these studies were limited by their cross-  
429 sectional study design and lack of longitudinal sampling. This is particularly limiting when  
430 considering the effects of antibiotic treatment for CDI on the gut microbiota.

431         There are only two published studies examining longitudinal changes in the gut  
432 microbiota in rCDI. Seekatz, *et al.* demonstrated significant differences at baseline in  
433 community structure in rCDI vs. non-rCDI patients.<sup>17</sup> Notably, patients with rCDI were more  
434 likely to show greater intra-individual similarity in their gut microbiota longitudinally compared  
435 with non-rCDI patients, which is discordant with our results. However, similar to the study  
436 design by Khanna, *et al.*, patients were retrospectively designated as having rCDI vs. recovery  
437 by chart review. Additionally, the number of and interval between samples collected was highly  
438 variable with samples collected up to 800 days after initial CDI diagnosis. Thus, our respective

439 studies may have captured different trajectories in gut microbial changes between perturbation  
440 and reconstitution resulting in rCDI or recovery. Furthermore, our results may provide a more  
441 clinically useful model given the ability to determine risk for rCDI at baseline, or shortly after  
442 completion of antibiotics rather than weeks or months after collection of the index sample.

443         In the first prospective longitudinal study regarding fecal microbial changes in rCDI,  
444 Pakpour, *et al.* identified decreased Shannon diversity, depletion of Bacteroidetes and reduced  
445 abundance of *Veillonella dispar* by random forest models as being predictive of rCDI.<sup>38</sup>  
446 However, the predictive capability of their model was poor (AuROC=0.68). Although there were  
447 differences in the microbial characteristics identified, this was likely related to differences in  
448 patient populations between our studies. The majority of patients enrolled by Pakpour, *et al.*  
449 identified as being of Afro-Caribbean descent and IBD patients were specifically excluded.  
450 Interestingly, these authors identified only baseline microbial characteristics as being  
451 associated with rCDI while their longitudinal samples could not discriminate between rCDI and  
452 non-rCDI. It is important to note two key methodologic differences between our respective  
453 studies. Pakpour, *et al.* collected three stool samples shortly after initiating antibiotic  
454 administration while a final sample was collected 4 days after completion of antibiotic  
455 treatment. It is possible that the gut microbiota may have been significantly disturbed by on-  
456 going antibiotic administration at this time point, which precluded discrimination between  
457 patients who recurred vs. those who recovered. Furthermore, subjects were only followed for  
458 2-4 weeks, which is likely insufficient follow-up time to adequately determine rCDI.

459         In contrast, we identified distinct temporal changes in the gut microbiota that were  
460 associated with rCDI. We identified specific microbial changes 14 days after completion of

461 antibiotics which were predictive for risk of future rCDI. Specifically, those patients whose fecal  
462 microbiota showed greater dissimilarity to their baseline samples were at highest risk for rCDI.  
463 This suggests that patients with on-going disruptions in the gut microbial ecosystem have a  
464 permissive state for recurrence of CDI. Additionally, we identified increased Ruminococcaceae  
465 and increased Enterobacteriaceae were associated with increased risk for rCDI while an  
466 increase in community richness and Faecalibacteria were protective against rCDI even after  
467 adjusting for UC status. Similar to Lachnospiraceae, Faecalibacteria are in the Clostridiales  
468 order, produce butyrate, and are associated with decreased risk for CDI.<sup>39</sup> Expansion of  
469 Enterobacteriaceae, which normally occupy only a small fraction of the distal gut microbiota in  
470 healthy subjects, can be seen during periods of gut inflammation, such as in IBD or CDI.<sup>3,40</sup>  
471 Interestingly, examining the fecal microbiota at baseline or at reconstitution (14 days after  
472 completion of antibiotics) separately produced more robust models compared with longitudinal  
473 associations by generalized estimating equations, mixed models or generalized additive models  
474 in this cohort. This suggests that studying the fecal microbiota separately at baseline or after  
475 reconstitution of the microbiome, rather than the trajectory of the gut microbiota  
476 longitudinally, will be most useful in identifying those patients at highest risk for rCDI.

477         Prior IBD studies have identified different microbial features that are associated with  
478 worse outcomes. Using a random forest classifier, Shaw, *et al.* identified two genera, including  
479 *Coprococcus* and *Adlercreutzia*, which showed fair predictive ability to identify responders to  
480 therapy in IBD (AuROC=0.75).<sup>41</sup> We identified prior hospitalization for UC in the previous year  
481 and increased Bacteroidetes at baseline as showing good predictive ability to identify patients  
482 at higher risk for subsequent UC flare in the next 180 days (AuROC=0.88). Previously, studies

483 have demonstrated increased Bacteroidetes from mucosal biopsies of UC patients compared  
484 with controls.<sup>42</sup> Some members of the Bacteroidetes phyla, such as certain *Bacteroides* species,  
485 can impair epithelial barrier function by producing mucin-degrading sulfatases or may lead to  
486 immune activation via Toll-like receptor 4.<sup>43,44</sup> It is notable that we were not able to develop a  
487 model identifying microbial characteristics longitudinally with risk for UC flare. This may reflect  
488 differences in the pathogenesis of these two different diseases, where UC may be driven more  
489 by host factors, while CDI is dependent on disruptions to the microbial ecological network. In  
490 addition, this study could have been underpowered for microbial differences in UC, and a larger  
491 cohort with increased frequency and/or longer duration of sampling could be required to  
492 develop more robust microbial-driven models of UC exacerbation given the wide variability of  
493 the IBD microbiome.<sup>45</sup>

494 It is difficult to clinically differentiate between an exacerbation of UC vs. CDI in UC  
495 patients.<sup>46</sup> Our results suggest that patients with CDI have significant reductions in Shannon  
496 diversity and community richness at baseline even after controlling for UC status. Similarly, CDI  
497 patients have depletion of several OTUs at baseline, particularly in the genera Lachnospiraceae.  
498 These results suggest that baseline microbial features may be of help in differentiating between  
499 a flare and CDI in symptomatic UC patients while modulation of the microbiome in high-risk  
500 patients to increase abundance of Lachnospiraceae may be considered in future studies.

501 There are several notable strengths of our study, including the longitudinal study design  
502 with clinical outcome data for up to 6 months, repeated sample collection, robust demographic  
503 and clinical data, and well-defined study endpoints. However, there are limitations to our  
504 study. First, there were a small number of patients who developed UC flare, which likely

505 limited our ability to develop a predictive model for exacerbation of UC. Secondly, we only  
506 sampled the fecal microbiota, while the mucosal-associated microbiota may provide more  
507 relevant information regarding host-microbial interactions in UC and CDI. Finally, a longer  
508 follow-up time may be required for other important adverse clinical outcomes, such as those  
509 requiring colectomy.

510 In conclusion, we have identified characteristic temporal changes in the gut microbiota  
511 associated with increased risk for subsequent rCDI in a cohort of patients with UC and/or CDI.  
512 Although our findings require validation, these results could have important clinical  
513 implications. The novel ability to identify patients at high risk for rCDI with over 90% accuracy  
514 using a single stool sample, either at baseline prior to initiation of antibiotics or 14 days after  
515 completion of antibiotics, could affect future clinical decision making. Inclusion of changes in  
516 microbial diversity over time adds accuracy to the model but may be less clinically useful as this  
517 requires sampling at two different time points. Clinicians could utilize this microbial-derived  
518 information to escalate preventive therapy in higher-risk patients if prospective studies validate  
519 a risk-stratified strategy of preventive therapy. Future work will focus on the mechanisms of  
520 how shifts in the gut microbiota predispose patients to rCDI, and rational design of preventive  
521 probiotics to reduce recurrence of *Clostridioides difficile* infection in high risk patients.

522

523

524

525

526



527 **REFERENCES:**

- 528 1. Nagao-Kitamoto H, Shreiner AB, Gilliland MG, et al. Functional Characterization of  
529 Inflammatory Bowel Disease-Associated Gut Dysbiosis in Gnotobiotic Mice. *Cell Mol*  
530 *Gastroenterol Hepatol* 2016;2:468–481.
- 531 2. Lupp C, Robertson ML, Wickham ME, et al. Host-Mediated Inflammation Disrupts the  
532 Intestinal Microbiota and Promotes the Overgrowth of Enterobacteriaceae. *Cell Host*  
533 *Microbe* 2007;2:119–129.
- 534 3. Gevers D, Kugathasan S, Denson LA, et al. The Treatment-Naive Microbiome in New-Onset  
535 Crohn’s Disease. *Cell Host Microbe* 2014;15:382–392.
- 536 4. Rodemann JF, Dubberke ER, Reske KA, et al. Incidence of *Clostridium difficile* infection in  
537 inflammatory bowel disease. *Clin Gastroenterol Hepatol Off Clin Pract J Am Gastroenterol*  
538 *Assoc* 2007;5:339–344.
- 539 5. Nguyen GC, Kaplan GG, Harris ML, et al. A national survey of the prevalence and impact of  
540 *Clostridium difficile* infection among hospitalized inflammatory bowel disease patients. *Am*  
541 *J Gastroenterol* 2008;103:1443–1450.
- 542 6. Lawson PA, Citron DM, Tyrrell KL, et al. Reclassification of *Clostridium difficile* as  
543 *Clostridioides difficile* (Hall and O’Toole 1935) Prévot 1938. *Anaerobe* 2016;40:95–99.
- 544 7. Rao K, Higgins PDR. Epidemiology, Diagnosis, and Management of *Clostridium difficile*  
545 Infection in Patients with Inflammatory Bowel Disease. *Inflamm Bowel Dis* 2016;22:1744–  
546 1754.

- 547 8. Reeves AE, Theriot CM, Bergin IL, et al. The interplay between microbiome dynamics and  
548 pathogen dynamics in a murine model of *Clostridium difficile* Infection. Gut Microbes  
549 2011;2:145–158.
- 550 9. Ananthakrishnan AN, McGinley EL, Binion DG. Excess hospitalisation burden associated  
551 with *Clostridium difficile* in patients with inflammatory bowel disease. Gut 2008;57:205–  
552 210.
- 553 10. Ananthakrishnan AN, McGinley EL, Saeian K, et al. Temporal trends in disease outcomes  
554 related to *Clostridium difficile* infection in patients with inflammatory bowel disease.  
555 Inflamm Bowel Dis 2011;17:976–983.
- 556 11. Kelsen JR, Kim J, Latta D, et al. Recurrence rate of *Clostridium difficile* infection in  
557 hospitalized pediatric patients with inflammatory bowel disease. Inflamm Bowel Dis  
558 2011;17:50–55.
- 559 12. Razik R, Rumman A, Bahreini Z, et al. Recurrence of *Clostridium difficile* Infection in  
560 Patients with Inflammatory Bowel Disease: The RECIDIVISM Study. Am J Gastroenterol  
561 2016;111:1141–1146.
- 562 13. Kornbluth A, Sachar DB, Practice Parameters Committee of the American College of  
563 Gastroenterology. Ulcerative colitis practice guidelines in adults: American College Of  
564 Gastroenterology, Practice Parameters Committee. Am J Gastroenterol 2010;105:501–  
565 523; quiz 524.
- 566 14. Lewis JD, Chuai S, Nessel L, et al. Use of the Non-invasive Components of the Mayo Score  
567 to Assess Clinical Response in Ulcerative Colitis. Inflamm Bowel Dis 2008;14:1660–1666.

- 568 15. McDonald LC, Gerding DN, Johnson S, et al. Clinical Practice Guidelines for *Clostridium*  
569 *difficile* Infection in Adults and Children: 2017 Update by the Infectious Diseases Society of  
570 America (IDSA) and Society for Healthcare Epidemiology of America (SHEA). Clin Infect Dis  
571 2018;66:e1–e48.
- 572 16. Schloss PD, Westcott SL, Ryabin T, et al. Introducing mothur: Open-Source, Platform-  
573 Independent, Community-Supported Software for Describing and Comparing Microbial  
574 Communities. Appl Environ Microbiol 2009;75:7537–7541.
- 575 17. Seekatz AM, Rao K, Santhosh K, et al. Dynamics of the fecal microbiome in patients with  
576 recurrent and nonrecurrent *Clostridium difficile* infection. Genome Med 2016;8. Available  
577 at: <https://www.ncbi.nlm.nih.gov/pmc/articles/PMC4847246/> [Accessed January 24,  
578 2019].
- 579 18. Arumugam M, Raes J, Pelletier E, et al. Enterotypes of the human gut microbiome. Nature  
580 2011;473:174–180.
- 581 19. Blount K, Jones C, Deych E, et al. 1966. Evaluating a Prototype Microbiome Health Index  
582 (MHI) as a Measure of Microbiome Restoration Using Data Derived From a Published  
583 Study of Fecal Microbiota Transplant (FMT) to Treat Recurrent *Clostridium difficile*  
584 Infections (rCDI). Open Forum Infect Dis 2018;5:S570.
- 585 20. Benjamini Y, Hochberg Y. Controlling the False Discovery Rate: A Practical and Powerful  
586 Approach to Multiple Testing. J R Stat Soc Ser B Methodol 1995;57:289–300.
- 587 21. Oksanen J, Blanchet G, Friendly M, et al. vegan: Community ecology package. R package  
588 version 2.5-4. 2019. Available at: <https://CRAN.R-project.org/package=vegan>.

- 589 22. Friedman JH, Hastie T, Tibshirani R. Regularization Paths for Generalized Linear Models via  
590 Coordinate Descent. *J Stat Softw* 2010;33:1–22.
- 591 23. Robin X, Turck N, Hainard A, et al. pROC: an open-source package for R and S+ to analyze  
592 and compare ROC curves. *BMC Bioinformatics* 2011;12:77.
- 593 24. Højsgaard S, Halekoh U, Yan J. The R Package geepack for Generalized Estimating  
594 Equations. *J Stat Softw* 2005;15:1–11.
- 595 25. Bates D, Mächler M, Bolker B, et al. Fitting Linear Mixed-Effects Models Using lme4. *J Stat*  
596 *Softw* 2015;67:1–48.
- 597 26. Wood SN. Stable and Efficient Multiple Smoothing Parameter Estimation for Generalized  
598 Additive Models. *J Am Stat Assoc* 2004;99:673–686.
- 599 27. Crook DW, Walker AS, Kean Y, et al. Fidaxomicin Versus Vancomycin for *Clostridium*  
600 *difficile* Infection: Meta-analysis of Pivotal Randomized Controlled Trials. *Clin Infect Dis*  
601 2012;55:S93–S103.
- 602 28. Wilcox MH, Gerding DN, Poxton IR, et al. Bezlotoxumab for Prevention of Recurrent  
603 *Clostridium difficile* Infection. *N Engl J Med* 2017;376:305–317.
- 604 29. Lessa FC, Mu Y, Bamberg WM, et al. Burden of *Clostridium difficile* Infection in the United  
605 States. *N Engl J Med* 2015;372:825–834.
- 606 30. Markle JGM, Frank DN, Mortin-Toth S, et al. Sex Differences in the Gut Microbiome Drive  
607 Hormone-Dependent Regulation of Autoimmunity. *Science* 2013;339:1084–1088.
- 608 31. Schirmer M, Denson L, Vlamakis H, et al. Compositional and Temporal Changes in the Gut  
609 Microbiome of Pediatric Ulcerative Colitis Patients Are Linked to Disease Course. *Cell Host*  
610 *Microbe* 2018;24:600-610.e4.

- 611 32. Schubert AM, Rogers MAM, Ring C, et al. Microbiome Data Distinguish Patients with  
612 *Clostridium difficile* Infection and Non-*C. difficile*-Associated Diarrhea from Healthy  
613 Controls. *mBio* 2014;5.
- 614 33. Rolfe RD. Role of volatile fatty acids in colonization resistance to *Clostridium difficile*. *Infect*  
615 *Immun* 1984;45:185–191.
- 616 34. Hamer HM, Jonkers D, Venema K, et al. Review article: the role of butyrate on colonic  
617 function. *Aliment Pharmacol Ther* 2008;27:104–119.
- 618 35. Petrof EO, Gloor GB, Vanner SJ, et al. Stool substitute transplant therapy for the  
619 eradication of *Clostridium difficile* infection: “RePOOPulating” the gut. *Microbiome*  
620 2013;1:3.
- 621 36. Ross CL, Spinler JK, Savidge TC. Structural and functional changes within the gut microbiota  
622 and susceptibility to *Clostridium difficile* infection. *Anaerobe* 2016;41:37–43.
- 623 37. Khanna S, Montassier E, Schmidt B, et al. Gut microbiome predictors of treatment  
624 response and recurrence in primary *Clostridium difficile* infection. *Aliment Pharmacol Ther*  
625 2016;44:715–727.
- 626 38. Pakpour S, Bhanvadia A, Zhu R, et al. Identifying predictive features of *Clostridium difficile*  
627 infection recurrence before, during, and after primary antibiotic treatment. *Microbiome*  
628 2017;5:148.
- 629 39. Milani C, Ticinesi A, Gerritsen J, et al. Gut microbiota composition and *Clostridium difficile*  
630 infection in hospitalized elderly individuals: a metagenomic study. *Sci Rep* 2016;6:25945.
- 631 40. Seekatz AM, Young VB. *Clostridium difficile* and the microbiota. *J Clin Invest*  
632 2014;124:4182–4189.

- 633 41. Shaw KA, Bertha M, Hofmekler T, et al. Dysbiosis, inflammation, and response to  
634 treatment: a longitudinal study of pediatric subjects with newly diagnosed inflammatory  
635 bowel disease. *Genome Med* 2016;8:75.
- 636 42. Swidsinski A, Ladhoff A, Pernthaler A, et al. Mucosal flora in inflammatory bowel disease.  
637 *Gastroenterology* 2002;122:44–54.
- 638 43. Lucke K, Miehle S, Jacobs E, et al. Prevalence of *Bacteroides* and *Prevotella* spp. in  
639 ulcerative colitis. *J Med Microbiol* 2006;55:617–624.
- 640 44. Erridge C, Pridmore A, Eley A, et al. Lipopolysaccharides of *Bacteroides fragilis*, *Chlamydia*  
641 *trachomatis* and *Pseudomonas aeruginosa* signal via Toll-like receptor 2. *J Med Microbiol*  
642 2004;53:735–740.
- 643 45. Halfvarson J, Brislawn CJ, Lamendella R, et al. Dynamics of the human gut microbiome in  
644 inflammatory bowel disease. *Nat Microbiol* 2017;2:17004.
- 645 46. Reinink AR, Limsrivilai J, Reutemann BA, et al. Differentiating *Clostridium difficile* Colitis  
646 from *Clostridium difficile* Colonization in Ulcerative Colitis: A Role for Procalcitonin?  
647 *Digestion* 2017;96:207–212.
- 648 47. Kozich JJ, Westcott SL, Baxter NT, et al. Development of a Dual-Index Sequencing Strategy  
649 and Curation Pipeline for Analyzing Amplicon Sequence Data on the MiSeq Illumina  
650 Sequencing Platform. *Appl Environ Microbiol* 2013;79:5112–5120.
- 651 48. Pruesse E, Quast C, Knittel K, et al. SILVA: a comprehensive online resource for quality  
652 checked and aligned ribosomal RNA sequence data compatible with ARB. *Nucleic Acids*  
653 *Res* 2007;35:7188–7196.

654 49. Wang Q, Garrity GM, Tiedje JM, et al. Naïve Bayesian Classifier for Rapid Assignment of  
655 rRNA Sequences into the New Bacterial Taxonomy. *Appl Environ Microbiol* 2007;73:5261–  
656 5267.

657

658

659

660

661

662

663

664

665

666

667

668

669

670

671

672

673

674

675

676 **TABLE LEGEND:**

677 **Table 1. Baseline Demographic Variables for Patients with Ulcerative Colitis (UC) with or**  
 678 **without *Clostridium difficile* Infection (CDI).**

|                                                  | UC/CDI<br>(n = 32) | CDI only<br>(n = 14) | UC only<br>(n = 11) | P-value |
|--------------------------------------------------|--------------------|----------------------|---------------------|---------|
| Age, median (range)                              | 40.4 (18.1-85.7)   | 66.5 (21.2-83.2)     | 45.0 (21.5-71.1)    | .001    |
| Gender, n (%)                                    |                    |                      |                     |         |
| Female                                           | 11 (34.4)          | 7 (50.0)             | 5 (45.5)            | .58     |
| Male                                             | 21 (65.6)          | 7 (50.0)             | 6 (54.5)            |         |
| Caucasian, n (%)                                 | 29 (90.6)          | 13 (92.9)            | 10 (90.9)           | >.99    |
| Pan colitis, n (%)                               | 26 (81.2)          | NA                   | 7 (63.6)            | .37     |
| History of Tobacco use, n (%)                    | 13 (40.6)          | 6 (42.9)             | 5 (50.0)            | .93     |
| Maintenance Therapy, n (%)                       |                    | NA                   |                     |         |
| 5-ASA                                            | 24 (75.0)          |                      | 8 (72.7)            | >.99    |
| Immunomodulator                                  | 15 (46.9)          |                      | 5 (45.5)            | >.99    |
| Biologics                                        | 15 (46.9)          |                      | 3 (27.3)            | .67     |
| Probiotic use, n (%)                             | 7 (21.9)           | 5 (38.5)             | 4 (44.4)            | .26     |
| Acid suppressive medications, n (%)              | 7 (22.6)           | 6 (42.9)             | 2 (20.0)            | .67     |
| Prior history of CDI, n (%)                      | 15 (46.9)          | 8 (57.1)             | NA                  | >.99    |
| Prior use of antibiotics in the past year, n (%) | 25 (80.6)          | 12 (85.7)            | 3 (30.0)            | .006    |
| UC flare, n (%)                                  | 11 (34.4)          | NA                   | NA                  |         |
| Biochemical parameters, median (range)           |                    |                      |                     |         |
| WBC, K/ $\mu$ L                                  | 7.0 (2.3-21.4)     | 10.6 (3.6-18.7)      | 9.5 (6.0-15.1)      | .39     |
| Albumin, g/dL                                    | 3.9 (2.8-5.1)      | 3.8 (2.6-4.4)        | 4.0 (2.8-4.9)       | .44     |
| BUN, mg/dL                                       | 13.0 (5.0-21.0)    | 12.0 (4.0-57.0)      | 10.0 (6.0-25.0)     | .06     |
| Creatinine, mg/dL                                | 0.8 (0.6-1.5)      | 0.7 (0.5-2.4)        | 0.8 (0.7-1.2)       | .27     |



|                                                                      |           |          |           |      |
|----------------------------------------------------------------------|-----------|----------|-----------|------|
| Steroid Administered for Treatment of UC flare, n (%)                | 10 (31.2) | NA       | 10 (90.9) | .001 |
| CDI Recurrence, n (%)                                                | 14 (43.8) | 7 (50.0) | NA        | .66  |
| Initial Antibiotic Treatment for CDI Recurrence<br>Vancomycin, n (%) | 23 (71.9) | 8 (57.1) | NA        | .63  |

679

680

681 **Table 2. Multivariable Logistic Regression Models of Clinical and Microbial Variables at**  
 682 **Baseline Associated with Recurrent *Clostridium difficile* Infection (rCDI).**

|                                                                          | OR   | 95% CI        | P-value |
|--------------------------------------------------------------------------|------|---------------|---------|
| <b><i>Clinical Variables Associated with Increased Risk for rCDI</i></b> |      |               |         |
| Female gender                                                            | 16.2 | 2.77 – 155.62 | .005    |
| <b><i>Microbial Variables Protective Against rCDI</i></b>                |      |               |         |
| OTU Richness (per every increase of 10 taxa)                             | 0.86 | 0.73 – 0.96   | .02     |
| Enterobacteriaceae (per every 10% increase)                              | 0.29 | 0.09 – 0.56   | .004    |
| Lachnospiraceae (per every 10% increase)                                 | 0.17 | 0.04 – 0.44   | .002    |
| Veillonellaceae (per every 10% increase)                                 | 0.17 | 0.02 – 0.75   | .05     |

683 Effect sizes are presented after adjustment for UC status.

684

685

686 **Table 3. Multivariable Logistic Regression Models of Clinical and Microbial Variables at Time**  
687 **Point 3 (14 days after Completion of Antibiotics) Associated with Recurrent *Clostridium***  
688 ***difficile* Infection (rCDI).**

|                                                                                        | OR   | 95% CI       | P-value |
|----------------------------------------------------------------------------------------|------|--------------|---------|
| <b><i>Clinical and Microbial Variables Associated with Increased Risk for rCDI</i></b> |      |              |         |
| Female gender                                                                          | 5.69 | 1.36 – 29.71 | .03     |
| Ruminococcaceae<br>(per every 1%<br>increase)                                          | 1.43 | 1.08 – 2.07  | .03     |
| Jensen Shannon<br>Divergence (per<br>every 0.1 increase)                               | 2.59 | 1.28 – 6.15  | .01     |
| <b><i>Microbial Variables Protective Against Risk for rCDI</i></b>                     |      |              |         |
| OTU Richness (per<br>every increase of 10<br>taxa)                                     | 0.83 | 0.66 – 0.96  | .03     |
| Faecalibacterium<br>(per every 1%<br>increase)                                         | 0.47 | 0.23 – 0.75  | .02     |

689 Effect sizes are presented after adjustment for UC status.

690

691 **FIGURE LEGEND:**

692 **Figure 1. Patients with Recurrent *Clostridium difficile* Infection (rCDI) Show Broad Differences**  
693 **in Microbial Community Structure Compared with non-rCDI.**

694 (A) Principal coordinates analysis (PCoA) based on redundancy analysis demonstrated  
695 significant differences in the community structure between patients who subsequently  
696 developed rCDI (red) compared with patients without rCDI (blue) ( $P=.008$  by PERMANOVA). (B)  
697 PCoA plot showing no differences between community structures in patients who subsequently  
698 developed UC flare (red) vs. non-UC flare (blue) ( $P=.44$ ).

699

700 **Figure 2. Patients with Recurrent *Clostridium difficile* Infection (rCDI) Show Significant**  
701 **Perturbations of the Fecal Microbiota Longitudinally Compared with Non-rCDI Patients.**  
702 Jensen-Shannon distance (JSD), a measure of intra-individual microbial community dissimilarity  
703 compared to baseline samples, was calculated over time. (A) At the end of antibiotics, there  
704 were no differences in JSD between patients who subsequently developed rCDI (red) and non-  
705 rCDI (blue) ( $P=.41$ ). (B) However, 14 days after completion of antibiotics, patients who  
706 subsequently developed rCDI (red) demonstrated a significantly elevated JSD (greater  
707 community dissimilarity relative to baseline samples) compared with non-rCDI patients (blue)  
708 ( $P=.004$ ). These results suggest that patients with on-going perturbations of the fecal  
709 microbiota 2 weeks after completion of antibiotics were at higher risk for rCDI.

710

711 **Figure 3. Identification of Microbial Variables at Baseline Associated with Increased or**  
712 **Decreased Risk for Recurrent *Clostridium difficile* Infection (rCDI).** Three bacterial taxa and  
713 community richness were identified by backward stepwise regression as being associated with  
714 subsequent rCDI. The relative abundances for these three taxa as well as community richness  
715 are shown grouped by whether or not rCDI occurred. Data are shown as violin plots with  
716 accompanying boxplot and whiskers indicating median, interquartile range (IQR) and 1.5 x IQR  
717 of the median for the following variables: (A) OTU richness, (B) Enterobacteriaceae, (C)  
718 Lachnospiraceae, and (D) Veillonellaceae. Note that OTU richness, Enterobacteriaceae, and  
719 Veillonellaceae are shown in logarithmic scale. (E) Receiver Operating Characteristic (ROC)  
720 Curve for this model identified by backward stepwise regression is shown (AuROC=0.91). (F)  
721 ROC for model selected by Lasso regression, which included variables for female gender,

722 hospitalization for UC in the previous year, and increased relative abundances of  
723 Ruminococcaceae and Verrucomicrobia, and decreased Eubacteriaceae, Enterobacteriaceae,  
724 Veillonellaceae, and Lachnospiraceae (AuROC=0.94).

725

726 **Figure 4. Fecal Microbial Characteristics at End of Antibiotics Plus 14 Days are Associated with**  
727 **Future Risk for Recurrent CDI.**

728 Several microbial variables 14 days after completion of antibiotics were identified as being  
729 associated with risk for future rCDI. The relative abundances for representative taxa as well as  
730 Shannon diversity and community richness are shown grouped by whether or not rCDI  
731 occurred. Data are shown as violin plots with accompanying boxplot and whiskers indicating  
732 median, interquartile range (IQR) and 1.5 x IQR of the median for the following variables: (A)  
733 OTU richness, (B) Ruminococcaceae, (C) Faecalibacterium, (D) Enterobacteriaceae, and (E)  
734 Shannon diversity over time, including at baseline, end of antibiotics (EOA), and end of  
735 antibiotics plus 14 days (EOA+14d). Note that OTU richness, Ruminococcaceae,  
736 Faecalibacterium, and Enterobacteriaceae are shown in logarithmic scale. (F) ROC curve  
737 displaying good fit characteristics of model identified by Lasso regression containing variables  
738 of female gender, increased Shannon diversity, increased relative abundances of  
739 Ruminococcaceae and Enterobacteriaceae, decreased OTU richness and Faecalibacterium, and  
740 Jensen Shannon Distance (relative to baseline) at end of antibiotics plus 14 days for risk of  
741 future rCDI (AuROC=0.94).

742

743

744 **SUPPLEMENTAL METHODS:**

745 ***Clinical Data Extraction:***

746 Clinical data were collected from patient interviews and manual chart review. Clinical  
747 and demographic variables included age, gender, ethnicity, current/prior smoking history,  
748 current therapy for UC, laboratory results, current/prior use of acid suppressive medications,  
749 current/prior use of probiotics, prior history of CDI, prior use of antibiotics within the past year,  
750 and hospitalization for UC in the past year.

751

752 ***DNA Extraction and 16S rRNA Sequencing:***

753 All stool samples were collected and immediately stored in a -80°C freezer. Total fecal  
754 DNA was extracted using the MoBio PowerMag soil isolation kit (MoBio Laboratories). DNA  
755 libraries were prepped by the University of Michigan Host Microbiome core as previously  
756 described.<sup>17</sup> Briefly, dual-index primers specific to the V4 region of the 16S rRNA gene were  
757 employed for DNA amplification.<sup>47</sup> PCR mixtures contained 5 µl of primer set at 4 µM  
758 concentration, 0.15 µl Accuprime High-Fidelity *Taq*, 2 µl of 10x Accuprime PCR II buffer (Life  
759 Technologies), 11.85 µl sterile water, and 1 µl of DNA template. Cycling conditions consisted of  
760 initial denaturation at 95°C for 2 min, followed by 30 cycles of 95°C for 20 s, 55°C for 15 s, 72°C  
761 for 5 min, and then 72°C for 10 min. Samples were normalized to the lowest concentration of  
762 the pooled plates by a Sequel Prep normalization plate kit (Life Technologies). Amplicons were  
763 pooled and quantified by the Kapa Biosystems Library Quantification kit (Kapa Biosystems)  
764 while amplicon size was determined by the Agilent Bioanalyzer high-sensitivity DNA analysis kit.

765 Libraries were then spiked with 10% PhiX to add diversity and sequenced on the Illumina MiSeq  
766 platform according to the manufacturer's specification for 500 cycles.

767

768 ***Raw Sequence Processing and Analysis:***

769 Raw sequence files were analyzed using the software package mothur (version 1.35.1).<sup>16</sup>

770 Sequences were then aligned to the V4 region using the SILVA rRNA database project (release

771 132).<sup>48</sup> Sequences were taxonomically classified at 80% bootstrap minimum using the RDP

772 database (release 11).<sup>49</sup> Operational taxonomic units (OTUs) were clustered at 97% similarity

773 and used for downstream community analyses. The number of OTUs (richness), Shannon

774 index, and Jensen-Shannon distance metrics were calculated in mothur using OTU abundance.

775 Principal coordinates analysis (PCoA) plots based on redundancy analysis were then analyzed

776 using the R package *vegan* (version 2.5-4).<sup>21</sup> Differences in community structure for each group

777 were compared using permutational multivariate ANOVA (PERMANOVA).

778

779

780

781

782

783

784

785

786

787 **SUPPLEMENTAL TABLES:**

788 **Supplemental Table 1. Changes in Microbial Variables at Baseline in Patients with *Clostridium***  
 789 ***difficile* Infection (CDI) Compared with Ulcerative Colitis.**

| Variable                  | $\beta$ -estimate (SE) | P-value* |
|---------------------------|------------------------|----------|
| Shannon diversity         | -0.44 (0.2)            | <.05     |
| OTU richness              | -83.03 (25.6)          | .002     |
| Veillonella (OTU0074)     | -1.65 (0.3)            | .006     |
| Lachnospiraceae (OTU0110) | -0.20 (0.1)            | .02      |
| Listeria (OTU0122)        | -0.61 (0.2)            | .02      |
| Lachnospiraceae (OTU0317) | -0.05 (0.02)           | .04      |
| Lachnospiraceae (OTU0487) | -0.002 (0.0004)        | .02      |
| Lachnospiraceae (OTU0639) | -0.005 (0.001)         | .02      |
| Clostridiales (OTU0766)   | -0.004 (0.001)         | .007     |

790 \*Note P-values are shown after correction by Benjamini-Hochberg method.

791 All estimates are adjusted to account for UC status.

792

793 **Supplemental Table 2. Unadjusted Odds Ratios for Baseline Clinical and Microbial Variables**

794 **Associated with Recurrent *Clostridium Difficile* Infection (rCDI) and Ulcerative Colitis (UC)**

795 **Flare.**

|                                          | UC Flare, OR<br>(95% CI)  | Unadjusted<br>P-value | CDI Recurrence,<br>OR (95% CI) | Unadjusted<br>P-value |
|------------------------------------------|---------------------------|-----------------------|--------------------------------|-----------------------|
| <b>Clinical Variables</b>                |                           |                       |                                |                       |
| Age, (for every<br>increase of 10 years) | 0.85 (0.53-1.30)          | .47                   | 0.93 (0.7-1.3)                 | .63                   |
| Caucasian race                           | >1000 (<0.001 -<br>>1000) | .99                   | 2.5 (0.3-50.8)                 | .79                   |
| Female gender                            | 0.61 (0.11-2.85)          | .54                   | 3.0 (1.0-9.6)                  | .05                   |
| Pan colitis                              | 0.44 (0.07-2.86)          | .38                   | 2.3 (0.5-16.8)                 | .34                   |
| Maintenance<br>medications for UC        |                           |                       |                                |                       |
| Other                                    | 0.83 (0.16-4.89)          | .83                   | 1.1 (0.4-3.2)                  | .91                   |
| Immunomodulator                          |                           |                       |                                |                       |

|                                                       |                                     |            |                                |            |
|-------------------------------------------------------|-------------------------------------|------------|--------------------------------|------------|
| Biologics                                             | 2.84 (0.39-3.78)<br>1.6 (0.37-7.25) | .18<br>.53 | 1.2 (0.4-3.8)<br>0.8 (0.2-2.5) | .72<br>.71 |
| Current Use of Acid Suppressive Medications           | 1.82 (0.30-10.56)                   | .50        | 1.8 (0.5-6.2)                  | .33        |
| Current use of Probiotics                             | 1.59 (0.26-9.02)                    | .60        | 1.0 (0.3-3.4)                  | .96        |
| Biochemical Parameters                                | 1.08 (0.89-1.32)                    | .44        | 1.1 (1.0-13)                   | .12        |
| WBC                                                   | 0.79 (0.18-3.22)                    | .74        | 1.1 (0.3-3.3)                  | .91        |
| Albumin                                               | 0.93 (0.72-1.18)                    | .57        | 1.0 (0.9-1.0)                  | .42        |
| BUN                                                   | 0.57 (0.008-22.1)                   | .76        | 0.06 (0.001-1.0)               | .11        |
| Creatinine                                            |                                     |            |                                |            |
| Hospitalization for UC in the Past Year               | 16.0 (2.97-117.76)                  | .003       | 3.7 (0.9-15.4)                 | .07        |
| Prior history of CDI                                  | 0.92 (0.21-4.0)                     | .91        | 2.1 (0.7-6.5)                  | .19        |
| Antibiotic Use in the Past Year                       | 3.32 (0.45-68.98)                   | .30        | 3.3 (0.88-16.0)                | .10        |
| Steroid Use as Rescue Med for Treatment of UC Flare   | 10.5 (2.03-69.67)                   | .008       | 0.4 (0.1-1.4)                  | .18        |
| Vancomycin as Initial Antibiotic for Treatment of CDI | 0.55 (0.11-2.78)                    | .46        | 0.6 (0.2-2.2)                  | .47        |
| <b>Microbial Variables at Baseline</b>                |                                     |            |                                |            |
| Shannon diversity                                     | 1.37 (0.44 – 5.90)                  | .61        | 0.58 (0.21 – 1.31)             | .19        |
| OTU Richness (per every 100% increase)                | 1.0 (0.99 – 1.02)                   | .53        | 0.56 (0.22 – 1.20)             | .17        |
| Firmicutes (per every 100% increase)                  | 0.12 (0.002 – 4.54)                 | .27        | 1.83 (0.10 – 35.71)            | .68        |
| Bacteroidetes (per every 10% increase)                | 2.06 (1.22 – 3.94)                  | .01        | 1.09 (0.79 – 1.49)             | .60        |
| Enterobacteriaceae (per every 10% increase)           | 0.51 (0.15 – 1.01)                  | .15        | 0.69 (0.39 – 1.03)             | .12        |
| Lachnospiraceae (per every 10% increase)              | 0.84 (0.46 – 1.46)                  | .55        | 0.52 (0.29 – 0.85)             | .02        |
| Veillonellaceae (per every 10% increase)              | 0.63 (0.18 – 1.75)                  | .42        | 0.53 (0.18 – 1.25)             | .18        |



796

797

798 **Supplemental Table 3. Lasso Regression Model of Clinical and Microbial Variables Associated**

799 **with Risk for Recurrent *Clostridium difficile* Infection (rCDI) at Baseline**

|                                                                                        | $\beta$ -Estimate |
|----------------------------------------------------------------------------------------|-------------------|
| <b><i>Clinical and Microbial Variables Associated with Increased Risk for rCDI</i></b> |                   |
| Hospitalization for UC in prior year                                                   | 1.72              |
| Female gender                                                                          | 1.26              |
| Verrucomicrobia                                                                        | 0.07              |
| Ruminococcaceae                                                                        | 0.06              |
| <b><i>Microbial Variables Protective Against rCDI</i></b>                              |                   |
| Eubacteriaceae                                                                         | -12.32            |
| Lachnospiraceae                                                                        | -0.07             |
| Veillonellaceae                                                                        | -0.06             |
| Enterobacteriaceae                                                                     | -0.04             |

800  $\beta$ -estimates for all microbial variables are represented per every 1% increase in relative

801 abundance.

802

803 **Supplemental Table 4. Unadjusted Odds Ratios for Microbial Variables Associated with**

804 **Recurrent *Clostridium difficile* Infection (rCDI) 14 days After Completion of Antibiotics.**

|                                                                           | OR   | 95% CI      | P-value |
|---------------------------------------------------------------------------|------|-------------|---------|
| <b><i>Microbial Variables Associated with Increased Risk for rCDI</i></b> |      |             |         |
| Gammaproteobacteria<br>(per every 10%<br>increase)                        | 1.63 | 1.07 – 2.72 | .04     |
| Enterobacteriaceae<br>(per every 10%<br>increase)                         | 1.78 | 1.12 – 3.16 | .03     |
| Jensen-Shannon<br>Divergence (per every<br>0.1 increase)                  | 1.77 | 1.17 – 2.91 | .01     |
| <b><i>Microbial Variables Protective Against Risk for rCDI</i></b>        |      |             |         |
| Shannon diversity                                                         | 0.34 | 0.11 – 0.91 | .04     |
| OTU Richness (per                                                         | 0.85 | 0.74 – 0.94 | .008    |

|                                           |      |              |     |
|-------------------------------------------|------|--------------|-----|
| every increase in 10 taxa)                |      |              |     |
| Bacteroidetes (per every 10% increase)    | 0.60 | 0.32 – 0.96  | .05 |
| MHI (per every 1% increase)               | 0.78 | 0.59 – 0.95  | .05 |
| Lachnospiraceae (per every 10% increase)  | 0.62 | 0.37 – 1.01  | .06 |
| Ruminococcaceae (per every 10% increase)  | 0.40 | 0.15 – 0.87  | .04 |
| Faecalibacterium (per every 10% increase) | 0.10 | 0.005 – 0.50 | .04 |

805

806 CI, confidence interval; MHI, Microbiome health index; OR, odds ratio; OTU, operational

807 taxonomic unit

808

809 **Supplemental Table 5. Lasso Regression Model of Clinical and Microbial Variables Associated**

810 **with Risk for Recurrent *Clostridium difficile* Infection (rCDI) 14 Days After Completion of**

811 **Antibiotics**

|                                                                                        | $\beta$ -Estimate |
|----------------------------------------------------------------------------------------|-------------------|
| <b><i>Clinical and Microbial Variables Associated with Increased Risk for rCDI</i></b> |                   |
| Jensen Shannon Diversity (relative to baseline sample)                                 | 5.84              |
| Female gender                                                                          | 1.53              |
| Shannon diversity                                                                      | 1.39              |
| Ruminococcaceae                                                                        | 0.20              |
| Enterobacteriaceae                                                                     | 0.04              |
| <b><i>Microbial Variables Protective Against rCDI</i></b>                              |                   |
| Faecalibacterium                                                                       | -0.29             |
| OTU richness                                                                           | -0.02             |

812  $\beta$ -estimates for OTU richness is represented for every increase in 1 taxa while microbial

813 variables are represented per every 1% increase in relative abundance.

814

815

816 **SUPPLEMENTAL FIGURES:**

817 **Supplemental Figure 1.** Consort Flow Diagram.

818

819 **Supplemental Figure 2. Study Design and Fecal Sample Collection Timeline.**

820 Subjects with ulcerative colitis (UC) and *Clostridium difficile* infection (CDI) as well as non-

821 inflammatory bowel disease (IBD) controls with CDI provided stool sample 1 (SS1) at day 0

822 when they had positive CDI testing but prior to initiation of antibiotics. Additional samples

823 were provided at the end of antibiotic therapy (SS2) and at the end of antibiotic therapy plus 14

824 days (SS3). Subjects were then contacted at 60, 120, and 180 days to assess for recurrent UC

825 flare and/or recurrent CDI. A third cohort of patients with UC flare without CDI provided stool

826 samples at baseline (SS1) and again at day 30 (SS2) when their disease was in remission.

827

828 **Supplemental Figure 3. Baseline Microbial Variables Associated with Ulcerative Colitis (UC)**

829 **Flare.**

830 Increased relative abundance of Bacteroidetes (presented on a logarithmic scale) (OR=2.06 for

831 every 10% increase,  $P=.01$ ) was significantly associated with risk for ulcerative colitis (UC) flare.

832 Data are shown as violin plot with accompanying boxplot and whiskers indicating median,

833 interquartile range (IQR) and 1.5 x IQR of the median.

834

835 **Supplemental Figure 4. Patients with Recurrent *Clostridium difficile* Infection (rCDI) and**  
836 **Ulcerative Colitis (UC) Flare Demonstrate Non-Linear Dynamic Changes in the Fecal**  
837 **Microbiota.**

838 Longitudinal modeling of the fecal microbiota demonstrated a non-linear pattern in this patient  
839 cohort. Representative examples include (A) Shannon diversity for patients with and without  
840 recurrent *Clostridium difficile* infection (rCDI) as well as (B) patients with and without ulcerative  
841 colitis (UC) flare are shown at baseline, end of antibiotics (EOA) and end of antibiotics plus 14  
842 days (EOA+14d). Individual subjects are represented by different colored lines. (C) Operational  
843 taxonomic unit (OTU) richness in patients with and without rCDI as well as (D) in patients with  
844 and without UC flare is also shown longitudinally. A locally estimated scatterplot smoothing  
845 (LOESS) curve has been fitted to the data and depicted by the black line with error bars in gray.  
846

**A**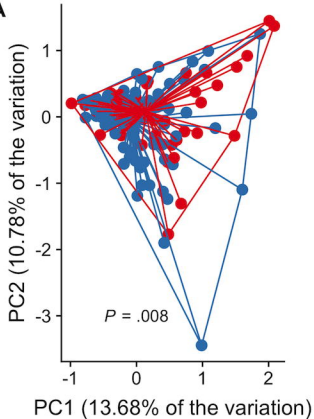

● No rCDI  
● rCDI

**B**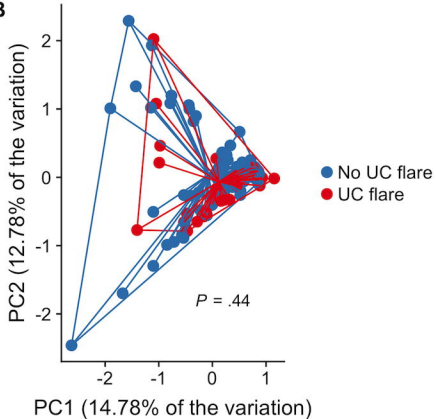

● No UC flare  
● UC flare

Greater  
Dissimilarity to  
Baseline Samples

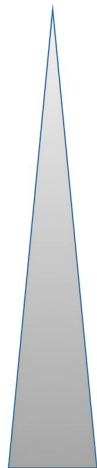

Less  
Dissimilarity to  
Baseline Samples

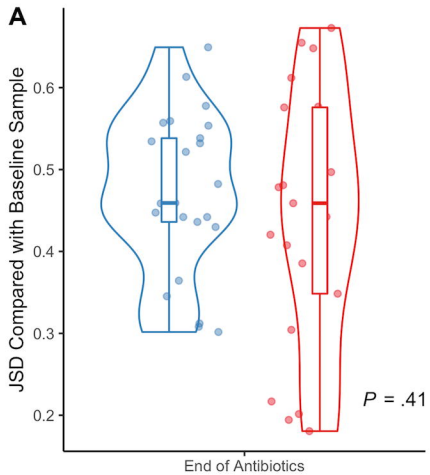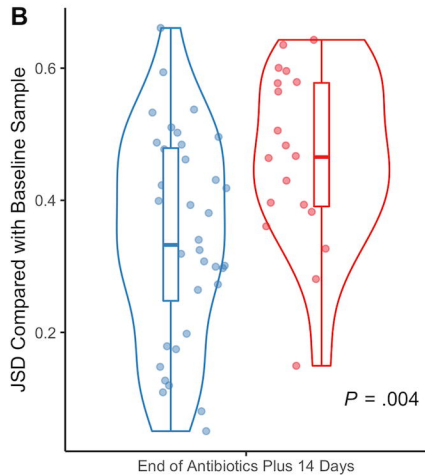

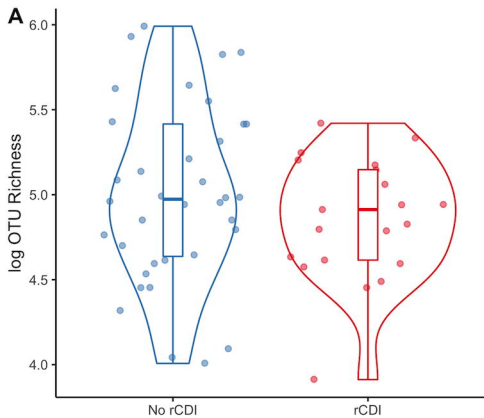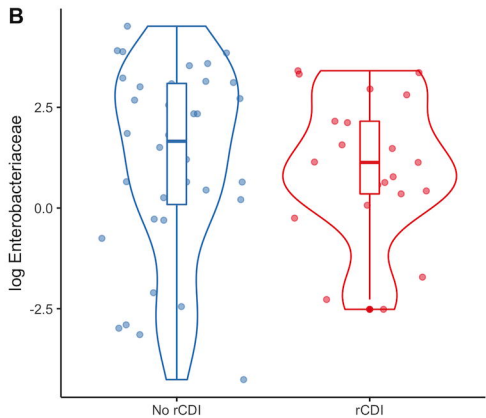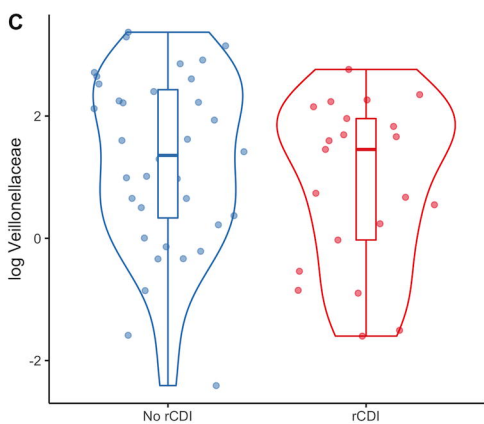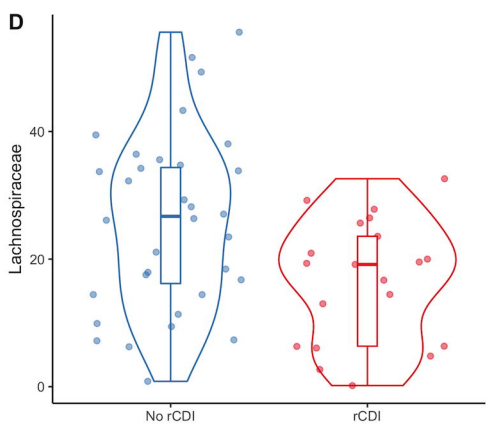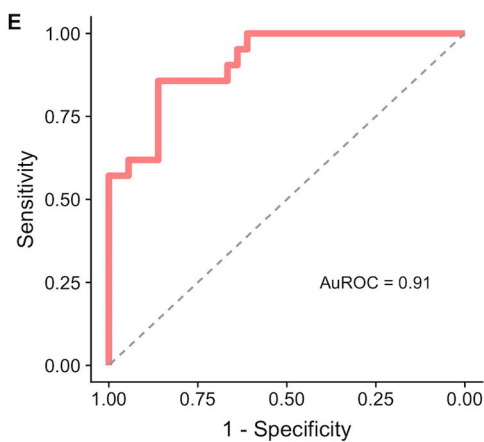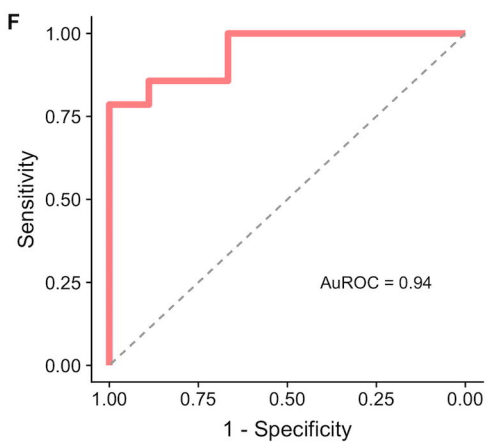

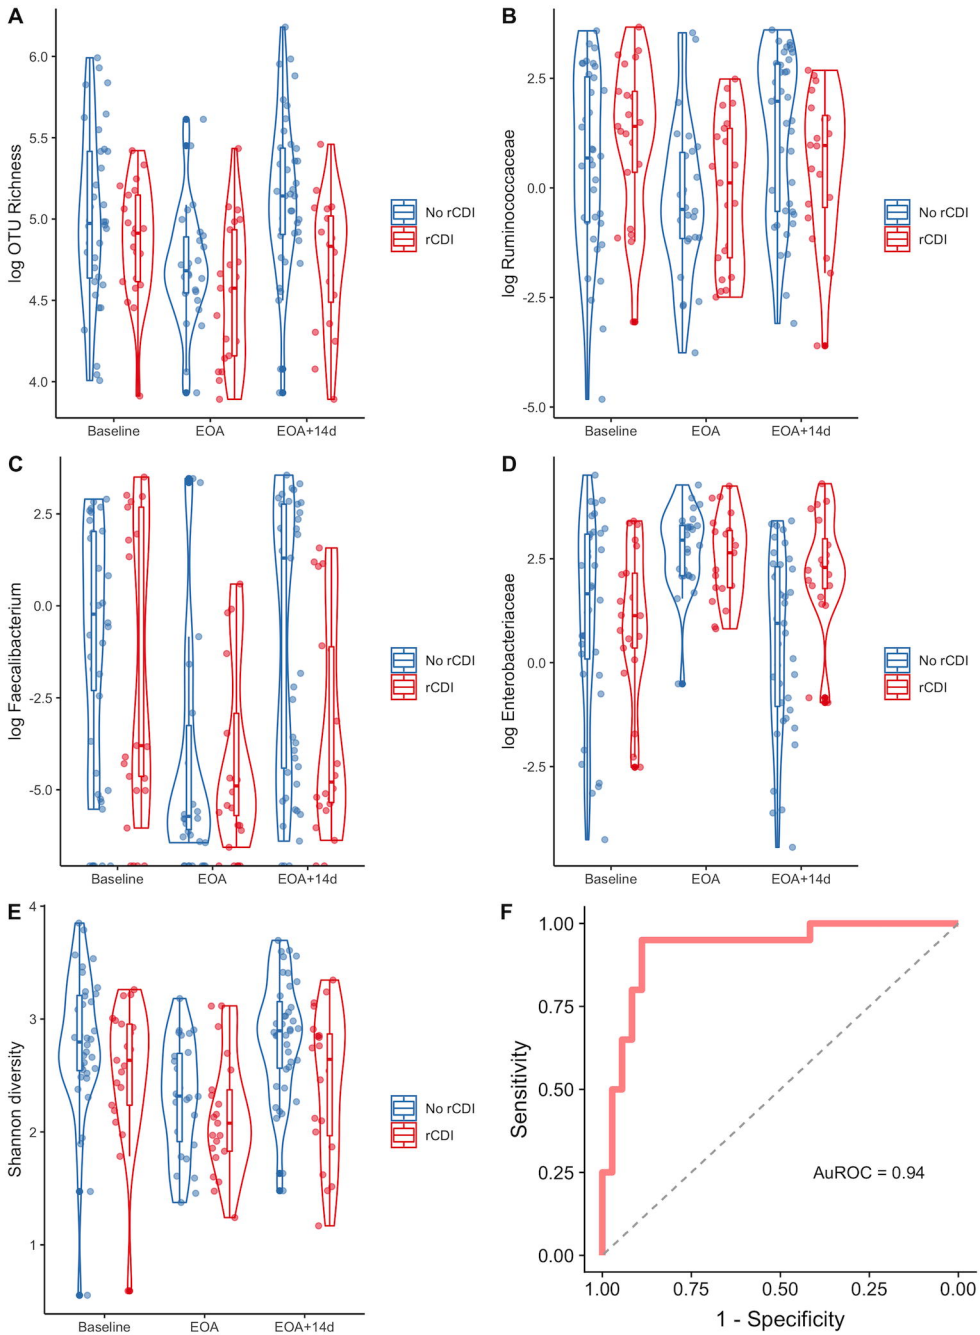

Source: https://www.biorxiv.org/content/10.1101/632778v1.full.pdf
